# Supplementary material for: Human Bocavirus Infection in Adults: Clinical Features and Radiological Findings
Source: PubMed Central journal article supplement — Korean J Radiol. 2019 Jun 25;20(7):1226–35. doi: 10.3348/kjr.2018.0634 (PMC6609429; doi:10.3348/kjr.2018.0634), 2019-06-25
Supplement: kjr-20-1226-s001.pdf [file kjr-20-1226-s001.pdf]

**Supplementary Table 1. Identified Respiratory Pathogens in Patients with Human Bocavirus Pneumonia**

| Total (n = 185)              | Upper Respiratory Infection (n = 75)  | Pneumonia (n = 110)                   |
|------------------------------|---------------------------------------|---------------------------------------|
| Co-infection (n = 88, 47.6%) | n = 34, 45.3%                         | n = 54, 49.1%                         |
| Combined pathogens           | Adenovirus (n = 1)                    | Adenovirus (n = 5)                    |
|                              | Coronavirus (n = 3)                   | Coronavirus (n = 3)                   |
|                              | Enterovirus (n = 2)                   | Human metapneumovirus (n = 2)         |
|                              | Human metapneumovirus (n = 1)         | Influenza A or B (n = 5)              |
|                              | Influenza A or B (n = 4)              | Parainfluenza virus 1, 3, 4 (n = 4)   |
|                              | Parainfluenza virus 1, 3, 4 (n = 3)   | Rhinovirus (n = 4)                    |
|                              | Rhinovirus (n = 8)                    | Acinetobacter baumannii (n = 10)      |
|                              | Acinetobacter baumannii (n = 2)       | Enterobacter cloacae (n = 1)          |
|                              | Enterobacter aerogenes (n = 1)        | Haemophilus influenzae (n = 1)        |
|                              | Pseudomonas aeruginosas (n = 1)       | Klebsiella pneumonia (n = 1)          |
|                              | Staphylococcus aureus (n = 2)         | Legionella pneumonia (n = 2)          |
|                              | Streptococcus pneumonia (n = 1)       | Mycoplasma pneumonia (n = 1)          |
|                              | Stenotorophomonas maltophilia (n = 2) | Pseudomonas aeruginosas (n = 5)       |
|                              | Aspergillus (n = 1)                   | Staphylococcus aureus (n = 9)         |
|                              | TB/NTM (n = 4)                        | Streptococcus pneumonia (n = 2)       |
|                              | Orientia tsutsugamushi (n = 1)        | Stenotorophomonas maltophilia (n = 2) |
|                              |                                       | Streptococcus agalactiae (n = 1)      |
|                              |                                       | Cytomegalovirus (n = 7)               |
|                              |                                       | Pneumocystis jirovecii (n = 1)        |
|                              |                                       | Aspergillus species (n = 2)           |
|                              |                                       | Pulmonary TB/NTM (n = 5)              |

TB = tuberculosis, NTM = nontuberculous mycobacteria
